# Supplementary material
Source: MDPI journal article supplement (https://www.mdpi.com/2076-0760/12/8/454)

**Figure S1.** Discrimination estimated marginal means for gender and sexual orientation.

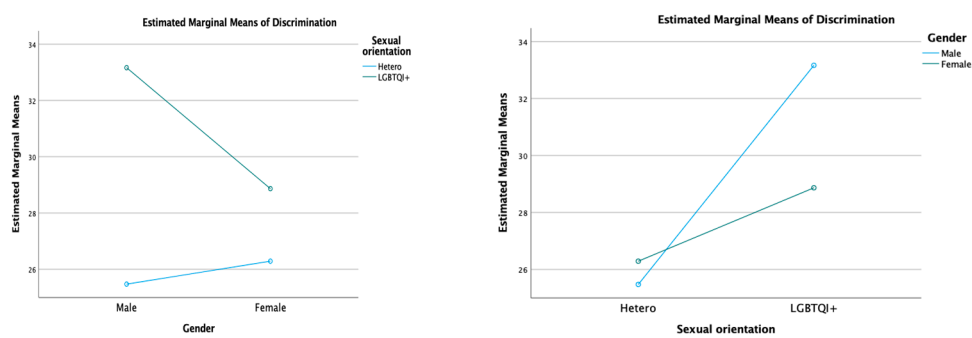

**Figure S2.** Shame estimated marginal means for gender and sexual orientation.

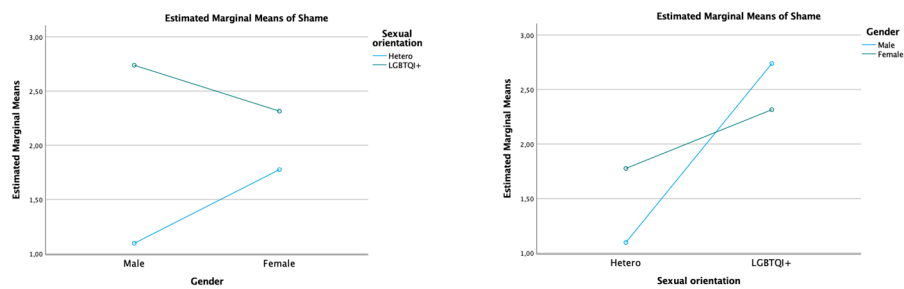

**Figure S3.** Depression estimated marginal means for gender and sexual orientation.

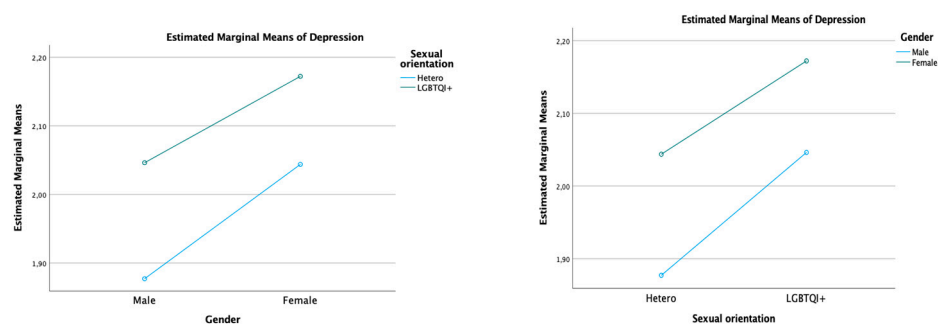

**Figure S4.** Anxiety estimated marginal means for gender and sexual orientation.

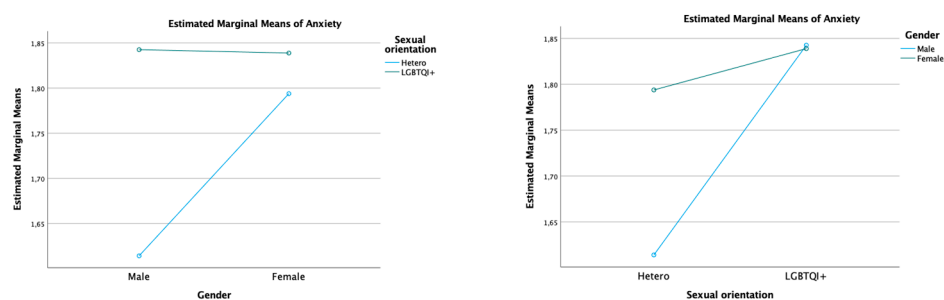

**Figure S5.** Social support estimated marginal means for gender and sexual orientation.

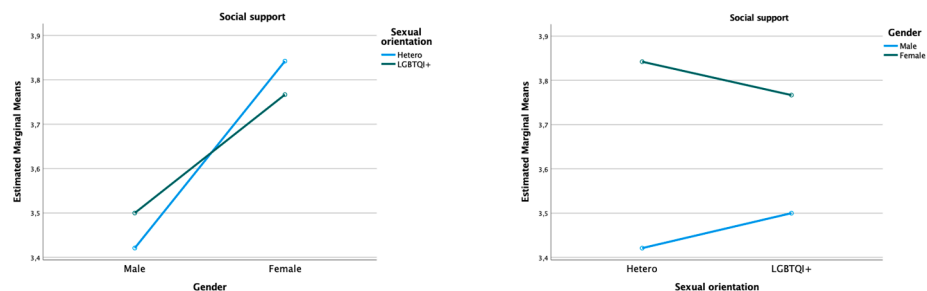

Supplement: s1 [file s1]
